# Supplementary material for: Self-Reported Efficacy of Cannabis and Other Complementary Medicine Modalities by Parkinson’s Disease Patients in Colorado
Source: Hindawi journal article supplement (doi:10.1155/2015/874849), 2015-01-01
Supplement: f1 [file 874849.f1.pdf]

Post Card Consent

Approved

NOV 02 2012

Date:

Valid for Use Through: COMIRB

**Study Title: Complementary and Alternative Medicine (CAM) usage and Parkinson's disease**

**Principal Investigator: Kristina Johnson**

**COMIRB No: 12-1375**

**Version Date:**

**Version No:**

---

You are being asked to be in this research study because you can give feedback on the types of Complementary and Alternative Medicine (CAM) therapies that Parkinson's disease patients are using to manage symptoms associated with Parkinson's disease.

If you join the study, you will be asked to fill out a survey both before and after the presentation.

This study is designed to learn more about the types of CAM therapies that Parkinson's disease patients are using to manage Parkinson's disease symptoms. Future Parkinson's disease and CAM therapy studies will be based on the information gathered from these surveys.

Every effort will be made to protect your privacy and confidentiality. No identifiers will be used in the survey – i.e. no names, date of birth or other identifying information will be collected in this survey.

You have a choice about being in this study. You do not have to be in this study if you do not want to be.

If you have questions, you can call Kristina Johnson at 303-905-2531. You can call and ask questions at any time.

You may have questions about your rights as someone in this study. If you have questions, you can call the COMIRB (the responsible Institutional Review Board). Their number is (303) 724-1055.

Postcard Consent

CF-157, Effective 4-26-2010

12-10-12

# Complementary and Alternative Medicine Survey

Approved

NOV 02 2012

COMIRB

Date \_\_\_\_\_

Survey ID \_\_\_\_\_

**Please complete the following information.**

1. Sex/Gender

- Male
- Female

2. Race

- White
- African-American
- Hispanic
- Asian/Pacific Islander
- Native American

**Please indicate the following in the space provided.**

3. Number of years of education (e.g. 12 years = high school graduate, 16 years = college graduate, etc.) \_\_\_\_\_

4. Household income \_\_\_\_\_

5. Age at initial diagnosis of Parkinson's disease \_\_\_\_\_

6. Number of years of Parkinson's disease symptoms \_\_\_\_\_

7. How many medications are you using currently to treat Parkinson's disease symptoms? \_\_\_\_\_

8. Please rate your current overall health

- Poor
- Fair
- Good
- Very good
- Excellent

9. Have you used or do you currently use Complementary and Alternative Medicine (CAM) therapies to treat Parkinson's disease (PD) symptoms?

- Yes
- No

10. If you use CAM therapies, is your physician aware that you use these therapies?

- Yes
- No
- Yes for some therapies, and No for some therapies
- N/A

11. If you share some CAM therapies with your physician, but not others, please indicate the CAM therapies that your physician does NOT know about.

\_\_\_\_\_

**How often do you use the following CAM therapies?****Natural Products**

|                                        | Never                    | Daily                    | Weekly                   | Monthly                  | Yearly                   |
|----------------------------------------|--------------------------|--------------------------|--------------------------|--------------------------|--------------------------|
| Vitamin E                              | <input type="checkbox"/> | <input type="checkbox"/> | <input type="checkbox"/> | <input type="checkbox"/> | <input type="checkbox"/> |
| Co-Q10                                 | <input type="checkbox"/> | <input type="checkbox"/> | <input type="checkbox"/> | <input type="checkbox"/> | <input type="checkbox"/> |
| Fava beans                             | <input type="checkbox"/> | <input type="checkbox"/> | <input type="checkbox"/> | <input type="checkbox"/> | <input type="checkbox"/> |
| Mucuna                                 | <input type="checkbox"/> | <input type="checkbox"/> | <input type="checkbox"/> | <input type="checkbox"/> | <input type="checkbox"/> |
| Multi-vitamin                          | <input type="checkbox"/> | <input type="checkbox"/> | <input type="checkbox"/> | <input type="checkbox"/> | <input type="checkbox"/> |
| Other vitamins/nutritional supplements | <input type="checkbox"/> | <input type="checkbox"/> | <input type="checkbox"/> | <input type="checkbox"/> | <input type="checkbox"/> |
| Other herbal supplements               | <input type="checkbox"/> | <input type="checkbox"/> | <input type="checkbox"/> | <input type="checkbox"/> | <input type="checkbox"/> |
| Medical marijuana                      | <input type="checkbox"/> | <input type="checkbox"/> | <input type="checkbox"/> | <input type="checkbox"/> | <input type="checkbox"/> |

**Mind/Body Medicine**

|                             | Never                    | Daily                    | Weekly                   | Monthly                  | Yearly                   |
|-----------------------------|--------------------------|--------------------------|--------------------------|--------------------------|--------------------------|
| Acupuncture and acupressure | <input type="checkbox"/> | <input type="checkbox"/> | <input type="checkbox"/> | <input type="checkbox"/> | <input type="checkbox"/> |
| Tai Chi                     | <input type="checkbox"/> | <input type="checkbox"/> | <input type="checkbox"/> | <input type="checkbox"/> | <input type="checkbox"/> |
| Meditation/mindfulness      | <input type="checkbox"/> | <input type="checkbox"/> | <input type="checkbox"/> | <input type="checkbox"/> | <input type="checkbox"/> |
| Yoga                        | <input type="checkbox"/> | <input type="checkbox"/> | <input type="checkbox"/> | <input type="checkbox"/> | <input type="checkbox"/> |
| Hypnotherapy                | <input type="checkbox"/> | <input type="checkbox"/> | <input type="checkbox"/> | <input type="checkbox"/> | <input type="checkbox"/> |
| Qi Gong                     | <input type="checkbox"/> | <input type="checkbox"/> | <input type="checkbox"/> | <input type="checkbox"/> | <input type="checkbox"/> |
| Relaxation techniques       | <input type="checkbox"/> | <input type="checkbox"/> | <input type="checkbox"/> | <input type="checkbox"/> | <input type="checkbox"/> |
| Imagery/visualization       | <input type="checkbox"/> | <input type="checkbox"/> | <input type="checkbox"/> | <input type="checkbox"/> | <input type="checkbox"/> |
| Biofeedback                 | <input type="checkbox"/> | <input type="checkbox"/> | <input type="checkbox"/> | <input type="checkbox"/> | <input type="checkbox"/> |

**Manipulative and Body-Based Practice**

|                         | Never                    | Daily                    | Weekly                   | Monthly                  | Yearly                   |
|-------------------------|--------------------------|--------------------------|--------------------------|--------------------------|--------------------------|
| Massage therapy         | <input type="checkbox"/> | <input type="checkbox"/> | <input type="checkbox"/> | <input type="checkbox"/> | <input type="checkbox"/> |
| Chiropractic techniques | <input type="checkbox"/> | <input type="checkbox"/> | <input type="checkbox"/> | <input type="checkbox"/> | <input type="checkbox"/> |
| Reflexology             | <input type="checkbox"/> | <input type="checkbox"/> | <input type="checkbox"/> | <input type="checkbox"/> | <input type="checkbox"/> |
| Physical therapy        | <input type="checkbox"/> | <input type="checkbox"/> | <input type="checkbox"/> | <input type="checkbox"/> | <input type="checkbox"/> |

**Whole Medical Systems**

|                                    | Never                    | Daily                    | Weekly                   | Monthly                  | Yearly                   |
|------------------------------------|--------------------------|--------------------------|--------------------------|--------------------------|--------------------------|
| Aruveda                            | <input type="checkbox"/> | <input type="checkbox"/> | <input type="checkbox"/> | <input type="checkbox"/> | <input type="checkbox"/> |
| TCM - Traditional Chinese Medicine | <input type="checkbox"/> | <input type="checkbox"/> | <input type="checkbox"/> | <input type="checkbox"/> | <input type="checkbox"/> |

---

---

**Other Therapies**

|                                       | Never                    | Daily                    | Weekly                   | Monthly                  | Yearly                   |
|---------------------------------------|--------------------------|--------------------------|--------------------------|--------------------------|--------------------------|
| Diet                                  | <input type="checkbox"/> | <input type="checkbox"/> | <input type="checkbox"/> | <input type="checkbox"/> | <input type="checkbox"/> |
| Exercise                              | <input type="checkbox"/> | <input type="checkbox"/> | <input type="checkbox"/> | <input type="checkbox"/> | <input type="checkbox"/> |
| Prayer                                | <input type="checkbox"/> | <input type="checkbox"/> | <input type="checkbox"/> | <input type="checkbox"/> | <input type="checkbox"/> |
| Energy healing (Reiki, Healing Touch) | <input type="checkbox"/> | <input type="checkbox"/> | <input type="checkbox"/> | <input type="checkbox"/> | <input type="checkbox"/> |
| Homeopathy                            | <input type="checkbox"/> | <input type="checkbox"/> | <input type="checkbox"/> | <input type="checkbox"/> | <input type="checkbox"/> |
| Spiritual healing                     | <input type="checkbox"/> | <input type="checkbox"/> | <input type="checkbox"/> | <input type="checkbox"/> | <input type="checkbox"/> |
| Cognitive behavioral therapy          | <input type="checkbox"/> | <input type="checkbox"/> | <input type="checkbox"/> | <input type="checkbox"/> | <input type="checkbox"/> |
| Music therapy                         | <input type="checkbox"/> | <input type="checkbox"/> | <input type="checkbox"/> | <input type="checkbox"/> | <input type="checkbox"/> |
| Art therapy                           | <input type="checkbox"/> | <input type="checkbox"/> | <input type="checkbox"/> | <input type="checkbox"/> | <input type="checkbox"/> |
| Chelation                             | <input type="checkbox"/> | <input type="checkbox"/> | <input type="checkbox"/> | <input type="checkbox"/> | <input type="checkbox"/> |
| Colonic hydrotherapy                  | <input type="checkbox"/> | <input type="checkbox"/> | <input type="checkbox"/> | <input type="checkbox"/> | <input type="checkbox"/> |
| IV therapies                          | <input type="checkbox"/> | <input type="checkbox"/> | <input type="checkbox"/> | <input type="checkbox"/> | <input type="checkbox"/> |
| Ionic foot baths                      | <input type="checkbox"/> | <input type="checkbox"/> | <input type="checkbox"/> | <input type="checkbox"/> | <input type="checkbox"/> |

---

---

**Additional therapies**

|              | Never                    | Daily                    | Weekly                   | Monthly                  | Yearly                   |
|--------------|--------------------------|--------------------------|--------------------------|--------------------------|--------------------------|
| Other: _____ | <input type="checkbox"/> | <input type="checkbox"/> | <input type="checkbox"/> | <input type="checkbox"/> | <input type="checkbox"/> |
| Other: _____ | <input type="checkbox"/> | <input type="checkbox"/> | <input type="checkbox"/> | <input type="checkbox"/> | <input type="checkbox"/> |
| Other: _____ | <input type="checkbox"/> | <input type="checkbox"/> | <input type="checkbox"/> | <input type="checkbox"/> | <input type="checkbox"/> |
| Other _____  | <input type="checkbox"/> | <input type="checkbox"/> | <input type="checkbox"/> | <input type="checkbox"/> | <input type="checkbox"/> |

# If you use CAM therapies for PD, have you noticed improvement in your symptoms, and if so how much?

## Natural Products

|                                        | N/A                      | Greatly improved         | Some improvement         | No improvement           | Worsening or side effects |
|----------------------------------------|--------------------------|--------------------------|--------------------------|--------------------------|---------------------------|
| Vitamin E                              | <input type="checkbox"/> | <input type="checkbox"/> | <input type="checkbox"/> | <input type="checkbox"/> | <input type="checkbox"/>  |
| Co-Q10                                 | <input type="checkbox"/> | <input type="checkbox"/> | <input type="checkbox"/> | <input type="checkbox"/> | <input type="checkbox"/>  |
| Fava beans                             | <input type="checkbox"/> | <input type="checkbox"/> | <input type="checkbox"/> | <input type="checkbox"/> | <input type="checkbox"/>  |
| Mucuna                                 | <input type="checkbox"/> | <input type="checkbox"/> | <input type="checkbox"/> | <input type="checkbox"/> | <input type="checkbox"/>  |
| Multi-vitamin                          | <input type="checkbox"/> | <input type="checkbox"/> | <input type="checkbox"/> | <input type="checkbox"/> | <input type="checkbox"/>  |
| Other vitamins/nutritional supplements | <input type="checkbox"/> | <input type="checkbox"/> | <input type="checkbox"/> | <input type="checkbox"/> | <input type="checkbox"/>  |
| Other herbal supplements               | <input type="checkbox"/> | <input type="checkbox"/> | <input type="checkbox"/> | <input type="checkbox"/> | <input type="checkbox"/>  |
| Medical marijuana                      | <input type="checkbox"/> | <input type="checkbox"/> | <input type="checkbox"/> | <input type="checkbox"/> | <input type="checkbox"/>  |

## Mind/Body Medicine

|                            | N/A                      | Greatly improved         | Some improvement         | No improvement           | Worsening or side effects |
|----------------------------|--------------------------|--------------------------|--------------------------|--------------------------|---------------------------|
| Acupuncture or acupressure | <input type="checkbox"/> | <input type="checkbox"/> | <input type="checkbox"/> | <input type="checkbox"/> | <input type="checkbox"/>  |
| Tai Chi                    | <input type="checkbox"/> | <input type="checkbox"/> | <input type="checkbox"/> | <input type="checkbox"/> | <input type="checkbox"/>  |
| Meditation/mindfulness     | <input type="checkbox"/> | <input type="checkbox"/> | <input type="checkbox"/> | <input type="checkbox"/> | <input type="checkbox"/>  |
| Yoga                       | <input type="checkbox"/> | <input type="checkbox"/> | <input type="checkbox"/> | <input type="checkbox"/> | <input type="checkbox"/>  |
| Hypnotherapy               | <input type="checkbox"/> | <input type="checkbox"/> | <input type="checkbox"/> | <input type="checkbox"/> | <input type="checkbox"/>  |
| Qi Gong                    | <input type="checkbox"/> | <input type="checkbox"/> | <input type="checkbox"/> | <input type="checkbox"/> | <input type="checkbox"/>  |
| Relaxation techniques      | <input type="checkbox"/> | <input type="checkbox"/> | <input type="checkbox"/> | <input type="checkbox"/> | <input type="checkbox"/>  |
| Imagery/visualization      | <input type="checkbox"/> | <input type="checkbox"/> | <input type="checkbox"/> | <input type="checkbox"/> | <input type="checkbox"/>  |
| Biofeedback                | <input type="checkbox"/> | <input type="checkbox"/> | <input type="checkbox"/> | <input type="checkbox"/> | <input type="checkbox"/>  |

## Manipulative and Body-Based Practice

|                         | N/A                      | Greatly improved         | Some improvement         | No improvement           | Worsening or side effects |
|-------------------------|--------------------------|--------------------------|--------------------------|--------------------------|---------------------------|
| Massage therapy         | <input type="checkbox"/> | <input type="checkbox"/> | <input type="checkbox"/> | <input type="checkbox"/> | <input type="checkbox"/>  |
| Chiropractic techniques | <input type="checkbox"/> | <input type="checkbox"/> | <input type="checkbox"/> | <input type="checkbox"/> | <input type="checkbox"/>  |
| Reflexology             | <input type="checkbox"/> | <input type="checkbox"/> | <input type="checkbox"/> | <input type="checkbox"/> | <input type="checkbox"/>  |
| Physical therapy        | <input type="checkbox"/> | <input type="checkbox"/> | <input type="checkbox"/> | <input type="checkbox"/> | <input type="checkbox"/>  |

**Whole Medical Systems**

|                                    | N/A                      | Greatly improved         | Some improvement         | No improvement           | Worsening or side effects |
|------------------------------------|--------------------------|--------------------------|--------------------------|--------------------------|---------------------------|
| Aruveda                            | <input type="checkbox"/> | <input type="checkbox"/> | <input type="checkbox"/> | <input type="checkbox"/> | <input type="checkbox"/>  |
| TCM - Traditional Chinese Medicine | <input type="checkbox"/> | <input type="checkbox"/> | <input type="checkbox"/> | <input type="checkbox"/> | <input type="checkbox"/>  |

**Other Therapies**

|                                       | N/A                      | Greatly improved         | Some improvement         | No improvement           | Worsening or side effects |
|---------------------------------------|--------------------------|--------------------------|--------------------------|--------------------------|---------------------------|
| Diet                                  | <input type="checkbox"/> | <input type="checkbox"/> | <input type="checkbox"/> | <input type="checkbox"/> | <input type="checkbox"/>  |
| Exercise                              | <input type="checkbox"/> | <input type="checkbox"/> | <input type="checkbox"/> | <input type="checkbox"/> | <input type="checkbox"/>  |
| Prayer                                | <input type="checkbox"/> | <input type="checkbox"/> | <input type="checkbox"/> | <input type="checkbox"/> | <input type="checkbox"/>  |
| Energy healing (Reiki, Healing Touch) | <input type="checkbox"/> | <input type="checkbox"/> | <input type="checkbox"/> | <input type="checkbox"/> | <input type="checkbox"/>  |
| Homeopathy                            | <input type="checkbox"/> | <input type="checkbox"/> | <input type="checkbox"/> | <input type="checkbox"/> | <input type="checkbox"/>  |
| Spiritual healing                     | <input type="checkbox"/> | <input type="checkbox"/> | <input type="checkbox"/> | <input type="checkbox"/> | <input type="checkbox"/>  |
| Cognitive behavioral therapy          | <input type="checkbox"/> | <input type="checkbox"/> | <input type="checkbox"/> | <input type="checkbox"/> | <input type="checkbox"/>  |
| Music therapy                         | <input type="checkbox"/> | <input type="checkbox"/> | <input type="checkbox"/> | <input type="checkbox"/> | <input type="checkbox"/>  |
| Art therapy                           | <input type="checkbox"/> | <input type="checkbox"/> | <input type="checkbox"/> | <input type="checkbox"/> | <input type="checkbox"/>  |
| Chelation                             | <input type="checkbox"/> | <input type="checkbox"/> | <input type="checkbox"/> | <input type="checkbox"/> | <input type="checkbox"/>  |
| Colonic hydrotherapy                  | <input type="checkbox"/> | <input type="checkbox"/> | <input type="checkbox"/> | <input type="checkbox"/> | <input type="checkbox"/>  |
| IV therapies                          | <input type="checkbox"/> | <input type="checkbox"/> | <input type="checkbox"/> | <input type="checkbox"/> | <input type="checkbox"/>  |
| Ionic foot baths                      | <input type="checkbox"/> | <input type="checkbox"/> | <input type="checkbox"/> | <input type="checkbox"/> | <input type="checkbox"/>  |

**Additional therapies**

|              | N/A                      | Greatly improved         | Some improvement         | No improvement           | Worsening or side effects |
|--------------|--------------------------|--------------------------|--------------------------|--------------------------|---------------------------|
| Other: _____ | <input type="checkbox"/> | <input type="checkbox"/> | <input type="checkbox"/> | <input type="checkbox"/> | <input type="checkbox"/>  |
| Other: _____ | <input type="checkbox"/> | <input type="checkbox"/> | <input type="checkbox"/> | <input type="checkbox"/> | <input type="checkbox"/>  |
| Other: _____ | <input type="checkbox"/> | <input type="checkbox"/> | <input type="checkbox"/> | <input type="checkbox"/> | <input type="checkbox"/>  |
| Other: _____ | <input type="checkbox"/> | <input type="checkbox"/> | <input type="checkbox"/> | <input type="checkbox"/> | <input type="checkbox"/>  |

## If you use CAM therapies for PD, which of the following have improved? (Mark all that apply.)

### Natural Products

|                                        | Quality of life          | Mood                     | Sleep                    | Energy                   | Motor symptoms<br>(e.g. tremor,<br>slowness,<br>stiffness) | Other                    |
|----------------------------------------|--------------------------|--------------------------|--------------------------|--------------------------|------------------------------------------------------------|--------------------------|
| Vitamin E                              | <input type="checkbox"/> | <input type="checkbox"/> | <input type="checkbox"/> | <input type="checkbox"/> | <input type="checkbox"/>                                   | <input type="checkbox"/> |
| CO-Q10                                 | <input type="checkbox"/> | <input type="checkbox"/> | <input type="checkbox"/> | <input type="checkbox"/> | <input type="checkbox"/>                                   | <input type="checkbox"/> |
| Fava Beans                             | <input type="checkbox"/> | <input type="checkbox"/> | <input type="checkbox"/> | <input type="checkbox"/> | <input type="checkbox"/>                                   | <input type="checkbox"/> |
| Mucuna                                 | <input type="checkbox"/> | <input type="checkbox"/> | <input type="checkbox"/> | <input type="checkbox"/> | <input type="checkbox"/>                                   | <input type="checkbox"/> |
| Multi-vitamin                          | <input type="checkbox"/> | <input type="checkbox"/> | <input type="checkbox"/> | <input type="checkbox"/> | <input type="checkbox"/>                                   | <input type="checkbox"/> |
| Other vitamins/nutritional supplements | <input type="checkbox"/> | <input type="checkbox"/> | <input type="checkbox"/> | <input type="checkbox"/> | <input type="checkbox"/>                                   | <input type="checkbox"/> |
| Other herbal supplements               | <input type="checkbox"/> | <input type="checkbox"/> | <input type="checkbox"/> | <input type="checkbox"/> | <input type="checkbox"/>                                   | <input type="checkbox"/> |
| Medical marijuana                      | <input type="checkbox"/> | <input type="checkbox"/> | <input type="checkbox"/> | <input type="checkbox"/> | <input type="checkbox"/>                                   | <input type="checkbox"/> |

### Mind/Body Medicine

|                            | Quality of life          | Mood                     | Sleep                    | Energy                   | Motor symptoms<br>(e.g. tremor,<br>slowness,<br>stiffness) | Other                    |
|----------------------------|--------------------------|--------------------------|--------------------------|--------------------------|------------------------------------------------------------|--------------------------|
| Acupuncture or acupressure | <input type="checkbox"/> | <input type="checkbox"/> | <input type="checkbox"/> | <input type="checkbox"/> | <input type="checkbox"/>                                   | <input type="checkbox"/> |
| Tai Chi                    | <input type="checkbox"/> | <input type="checkbox"/> | <input type="checkbox"/> | <input type="checkbox"/> | <input type="checkbox"/>                                   | <input type="checkbox"/> |
| Meditation/mindfulness     | <input type="checkbox"/> | <input type="checkbox"/> | <input type="checkbox"/> | <input type="checkbox"/> | <input type="checkbox"/>                                   | <input type="checkbox"/> |
| Yoga                       | <input type="checkbox"/> | <input type="checkbox"/> | <input type="checkbox"/> | <input type="checkbox"/> | <input type="checkbox"/>                                   | <input type="checkbox"/> |
| Hypnotherapy               | <input type="checkbox"/> | <input type="checkbox"/> | <input type="checkbox"/> | <input type="checkbox"/> | <input type="checkbox"/>                                   | <input type="checkbox"/> |
| Qi Gong                    | <input type="checkbox"/> | <input type="checkbox"/> | <input type="checkbox"/> | <input type="checkbox"/> | <input type="checkbox"/>                                   | <input type="checkbox"/> |
| Relaxation techniques      | <input type="checkbox"/> | <input type="checkbox"/> | <input type="checkbox"/> | <input type="checkbox"/> | <input type="checkbox"/>                                   | <input type="checkbox"/> |
| Imagery/visualization      | <input type="checkbox"/> | <input type="checkbox"/> | <input type="checkbox"/> | <input type="checkbox"/> | <input type="checkbox"/>                                   | <input type="checkbox"/> |
| Biofeedback                | <input type="checkbox"/> | <input type="checkbox"/> | <input type="checkbox"/> | <input type="checkbox"/> | <input type="checkbox"/>                                   | <input type="checkbox"/> |

### Manipulative and Body-Based Practice

|                         | Quality of life          | Mood                     | Sleep                    | Energy                   | Motor symptoms<br>(e.g. tremor,<br>slowness,<br>stiffness) | Other                    |
|-------------------------|--------------------------|--------------------------|--------------------------|--------------------------|------------------------------------------------------------|--------------------------|
| Massage therapy         | <input type="checkbox"/> | <input type="checkbox"/> | <input type="checkbox"/> | <input type="checkbox"/> | <input type="checkbox"/>                                   | <input type="checkbox"/> |
| Chiropractic techniques | <input type="checkbox"/> | <input type="checkbox"/> | <input type="checkbox"/> | <input type="checkbox"/> | <input type="checkbox"/>                                   | <input type="checkbox"/> |
| Reflexology             | <input type="checkbox"/> | <input type="checkbox"/> | <input type="checkbox"/> | <input type="checkbox"/> | <input type="checkbox"/>                                   | <input type="checkbox"/> |
| Physical therapy        | <input type="checkbox"/> | <input type="checkbox"/> | <input type="checkbox"/> | <input type="checkbox"/> | <input type="checkbox"/>                                   | <input type="checkbox"/> |

**Whole Medical Systems**

|                                    | Quality of life          | Mood                     | Sleep                    | Energy                   | Motor symptoms<br>(e.g. tremor, slowness, stiffness) | Other                    |
|------------------------------------|--------------------------|--------------------------|--------------------------|--------------------------|------------------------------------------------------|--------------------------|
| Aruveda                            | <input type="checkbox"/> | <input type="checkbox"/> | <input type="checkbox"/> | <input type="checkbox"/> | <input type="checkbox"/>                             | <input type="checkbox"/> |
| TCM - Traditional Chinese Medicine | <input type="checkbox"/> | <input type="checkbox"/> | <input type="checkbox"/> | <input type="checkbox"/> | <input type="checkbox"/>                             | <input type="checkbox"/> |

**Other Therapies**

|                                       | Quality of life          | Mood                     | Sleep                    | Energy                   | Motor symptoms<br>(e.g. tremor, slowness, stiffness) | Other                    |
|---------------------------------------|--------------------------|--------------------------|--------------------------|--------------------------|------------------------------------------------------|--------------------------|
| Diet                                  | <input type="checkbox"/> | <input type="checkbox"/> | <input type="checkbox"/> | <input type="checkbox"/> | <input type="checkbox"/>                             | <input type="checkbox"/> |
| Exercise                              | <input type="checkbox"/> | <input type="checkbox"/> | <input type="checkbox"/> | <input type="checkbox"/> | <input type="checkbox"/>                             | <input type="checkbox"/> |
| Prayer                                | <input type="checkbox"/> | <input type="checkbox"/> | <input type="checkbox"/> | <input type="checkbox"/> | <input type="checkbox"/>                             | <input type="checkbox"/> |
| Energy healing (Reiki, Healing Touch) | <input type="checkbox"/> | <input type="checkbox"/> | <input type="checkbox"/> | <input type="checkbox"/> | <input type="checkbox"/>                             | <input type="checkbox"/> |
| Homeopathy                            | <input type="checkbox"/> | <input type="checkbox"/> | <input type="checkbox"/> | <input type="checkbox"/> | <input type="checkbox"/>                             | <input type="checkbox"/> |
| Spiritual healing                     | <input type="checkbox"/> | <input type="checkbox"/> | <input type="checkbox"/> | <input type="checkbox"/> | <input type="checkbox"/>                             | <input type="checkbox"/> |
| Cognitive behavioral therapy          | <input type="checkbox"/> | <input type="checkbox"/> | <input type="checkbox"/> | <input type="checkbox"/> | <input type="checkbox"/>                             | <input type="checkbox"/> |
| Music therapy                         | <input type="checkbox"/> | <input type="checkbox"/> | <input type="checkbox"/> | <input type="checkbox"/> | <input type="checkbox"/>                             | <input type="checkbox"/> |
| Art therapy                           | <input type="checkbox"/> | <input type="checkbox"/> | <input type="checkbox"/> | <input type="checkbox"/> | <input type="checkbox"/>                             | <input type="checkbox"/> |
| Chelation                             | <input type="checkbox"/> | <input type="checkbox"/> | <input type="checkbox"/> | <input type="checkbox"/> | <input type="checkbox"/>                             | <input type="checkbox"/> |
| Colonic hydrotherapy                  | <input type="checkbox"/> | <input type="checkbox"/> | <input type="checkbox"/> | <input type="checkbox"/> | <input type="checkbox"/>                             | <input type="checkbox"/> |
| IV therapies                          | <input type="checkbox"/> | <input type="checkbox"/> | <input type="checkbox"/> | <input type="checkbox"/> | <input type="checkbox"/>                             | <input type="checkbox"/> |
| Ionic foot baths                      | <input type="checkbox"/> | <input type="checkbox"/> | <input type="checkbox"/> | <input type="checkbox"/> | <input type="checkbox"/>                             | <input type="checkbox"/> |

**Additional therapies not previously mentioned**

|              | Quality of life          | Mood                     | Sleep                    | Energy                   | Motor symptoms<br>(e.g. tremor, slowness, stiffness) | Other                    |
|--------------|--------------------------|--------------------------|--------------------------|--------------------------|------------------------------------------------------|--------------------------|
| Other: _____ | <input type="checkbox"/> | <input type="checkbox"/> | <input type="checkbox"/> | <input type="checkbox"/> | <input type="checkbox"/>                             | <input type="checkbox"/> |
| Other: _____ | <input type="checkbox"/> | <input type="checkbox"/> | <input type="checkbox"/> | <input type="checkbox"/> | <input type="checkbox"/>                             | <input type="checkbox"/> |
| Other: _____ | <input type="checkbox"/> | <input type="checkbox"/> | <input type="checkbox"/> | <input type="checkbox"/> | <input type="checkbox"/>                             | <input type="checkbox"/> |
| Other: _____ | <input type="checkbox"/> | <input type="checkbox"/> | <input type="checkbox"/> | <input type="checkbox"/> | <input type="checkbox"/>                             | <input type="checkbox"/> |

12. If you checked other in any category, please specify.

\_\_\_\_\_
